# Supplementary material
Source: PubMed Central journal article supplement (PMC6659166)
Supplement: jamasurg-154-923-s003.pdf [file jamasurg-154-923-s003.pdf]

## **Data Sharing Statement**

McCarty. Effectiveness of the American College of Surgeons Bleeding Control Basic Training Among Laypeople Applying Different Tourniquet Types. *JAMA Surg.* Published July 24, 2019.

10.1001/jamasurg.2019.2275

### **Data**

**Data available:** No
